# Supplementary material for: Cone-beam CT delta-radiomics to predict genitourinary toxicities and international prostate symptom of prostate cancer patients: a pilot study
Source: PubMed Central journal article supplement (PMC9684516; doi:10.1038/s41598-022-24435-8), 2022-11-22
Supplement: 41598_2022_24435_MOESM1_ESM.pdf [file 41598_2022_24435_MOESM1_ESM.pdf]

**Supplementary Information for “Cone-beam CT Delta-radiomics to Predict  
Genitourinary Toxicities and International Prostate Symptom of Prostate Cancer Patients:  
A Pilot Study”**

**1. Supplementary Tables**

**Supplementary Table S1.** Patient characteristics.

| <b>Characteristics</b>                | <b>Median</b>      | <b>Range</b>            |
|---------------------------------------|--------------------|-------------------------|
| Age (yr)                              | 50                 | 52-87                   |
| Gross Tumor Volume (cm <sup>3</sup> ) | 47.2               | 16-111                  |
|                                       | Number of Patients | Percent of Patients (%) |
| Gleason Score                         |                    |                         |
| 3+3                                   | 8                  | 16.0                    |
| 3+4                                   | 14                 | 28.0                    |
| 4+3                                   | 7                  | 14.0                    |
| 4+4                                   | 4                  | 8.0                     |
| 4+5                                   | 14                 | 28.0                    |
| 5+4                                   | 1                  | 2.0                     |
| 5+5                                   | 1                  | 2.0                     |
| Missing                               | 1                  | 2.0                     |
| Tumor Stage                           |                    |                         |
| T1c                                   | 18                 | 36.0                    |
| T2a                                   | 3                  | 6.0                     |
| T2b                                   | 8                  | 16.0                    |
| T2c                                   | 4                  | 8.0                     |
| T3a                                   | 9                  | 18.0                    |
| T3b                                   | 2                  | 4.0                     |
| Missing                               | 6                  | 12.0                    |
| Hormonal Use                          |                    |                         |
| Used                                  | 37                 | 74.0                    |
| None                                  | 13                 | 26.0                    |
| Total dose / Total fractions          |                    |                         |
| 70.2 Gy / 26 fx                       | 13                 | 26.0                    |
| 74 Gy / 37 fx                         | 1                  | 2.0                     |
| 76 Gy / 38 fx                         | 5                  | 10.0                    |
| 80 Gy / 40 fx                         | 26                 | 52.0                    |
| 81.4 Gy / 37 fx                       | 1                  | 2.0                     |
| 86 Gy / 40 fx                         | 1                  | 2.0                     |
| 91.2 Gy / 38 fx                       | 3                  | 6.0                     |

**Supplementary Table S2.** Summary of percentage of events by outcome and BED level.

| <b>Outcome</b> | <b>BED [Gy]</b> | <b>Category 0</b> | <b>Category 1</b> |
|----------------|-----------------|-------------------|-------------------|
| Acute GU       | 20              | 28%               | 72%               |
| Acute GU       | 40              | 29%               | 71%               |
| Acute GU       | 60              | 33%               | 67%               |
| Acute GU       | 80              | 31%               | 69%               |
| Acute GU       | 100             | 32%               | 68%               |
| Acute GU       | 120             | 37%               | 63%               |
| Sub-acute GU   | 20              | 44%               | 56%               |
| Sub-acute GU   | 40              | 44%               | 56%               |
| Sub-acute GU   | 60              | 44%               | 56%               |
| Sub-acute GU   | 80              | 44%               | 56%               |
| Sub-acute GU   | 100             | 44%               | 56%               |
| Sub-acute GU   | 120             | 44%               | 56%               |
| $\Delta$ IPSS  | 20              | 60%               | 40%               |
| $\Delta$ IPSS  | 40              | 60%               | 40%               |
| $\Delta$ IPSS  | 60              | 60%               | 40%               |
| $\Delta$ IPSS  | 80              | 60%               | 40%               |
| $\Delta$ IPSS  | 100             | 60%               | 40%               |
| $\Delta$ IPSS  | 120             | 60%               | 40%               |

**Supplementary Table S3.** Forty-two radiomic features were considered in this study. IBSI codes listed in brackets.

| <b>Feature Class</b>                                    | <b>Description</b>                                                                                                                           | <b>Features</b>                                                                                                                                                                                                                                                                                                                                                                                                                                                                                                                                                                      |
|---------------------------------------------------------|----------------------------------------------------------------------------------------------------------------------------------------------|--------------------------------------------------------------------------------------------------------------------------------------------------------------------------------------------------------------------------------------------------------------------------------------------------------------------------------------------------------------------------------------------------------------------------------------------------------------------------------------------------------------------------------------------------------------------------------------|
| Gray-level Co-occurrence Matrices (GLCM) [LFYI]         | GLCM feature used voxel displacements of 1 to quantify the frequency of a pattern of two intensities occurring together throughout an image. | Contrast [ACUI]<br>Correlation [NI2N]<br>Dissimilarity [8S9J]<br>Energy [8ZQL]<br>Entropy [TU9B]<br>Homogeneity [IB1Z]<br>Sum Average [ZGXS]<br>Variance [UR99]                                                                                                                                                                                                                                                                                                                                                                                                                      |
| Gray-level Run Length Matrices (GLRLM) [TPOI]           | GLRLM features encode for different run lengths of connected isotone voxels. Runs are computed in 13 directions of three-dimensional space.  | Gray-level Non-Uniformity (GLN) [R5YN]<br>Gray-level Variance (GLV) [8CE5]<br>High Gray-level Run Emphasis (HGRE) [G3QZ]<br>Long Run Emphasis (LRE) [W4KF]<br>Long Run High Gray-level Emphasis (LRHGE) [3KUM]<br>Long Run Low Gray-level Emphasis (LRLGE) [IVPO]<br>Low Gray-level Run Emphasis (LGRE) [V3SW]<br>Run Length Variance (RLV) [SXLW]<br>Run Percentage (RP) [9ZK5]<br>Run-Length Non-Uniformity (RLN) [W92Y]<br>Short Run Emphasis (SRE) [220V]<br>Short Run High Gray-level Emphasis (SRHGE) [GD3A]<br>Short Run Low Gray-level Emphasis (SRLGE) [HTZT]               |
| Gray-level Zone Size Matrices (GLZSM) [9SAK]:           | GLZSM features quantify image textures by considering the frequency of occurrence of all isotone gray-level regions                          | Gray-level Non-Uniformity (GLN) [JNSA]<br>Gray-level Variance (GLV) [BYLV]<br>High Gray-level Zone Emphasis (HGZE) [5GN9]<br>Large Zone Emphasis (LZE) [48P8]<br>Large Zones High Gray-level Emphasis (LZHGE) [J17V]<br>Large Zones Low Gray-level Emphasis (LZLGE) [YH51]<br>Low Gray-level Zone Emphasis (LGZE) [XMSY]<br>Short Zone Emphasis (SZE) [5QRC]<br>Short Zones High Gray-level Emphasis (SZHGE) [HW1V]<br>Short Zones Low Gray-level Emphasis (SZLGE) [5RAI]<br>Zone Percentage (ZP) [P30P]<br>Zone Size Non-Uniformity (ZSN) [4JP3]<br>Zone Size Variance (ZSV) [3NSA] |
| Neighborhood Gray-Tone Difference Matrix (NGTDM) [IPET] | NGTDM features quantify the difference between a voxel of interest and average of the surrounding $3 \times 3 \times 3$ voxel neighborhood   | Busyness (BUSY) [NQ30]<br>Coarseness (COAR)*<br>Complexity (CPLX) [HDEZ]<br>Contrast (CONT) [65HE]<br>Strength (STRG)*                                                                                                                                                                                                                                                                                                                                                                                                                                                               |
| Intensity-based Statistics (IS) [UHIW]                  | Statistics of region of interest.                                                                                                            | Kurtosis [IPH6]<br>Skewness [KE2A]<br>Variance [ECT3]                                                                                                                                                                                                                                                                                                                                                                                                                                                                                                                                |

\*NGTDM-based coarseness and strength are calculated as defined by Amadasun and King<sup>43</sup>.

## 2. Supplementary Figures

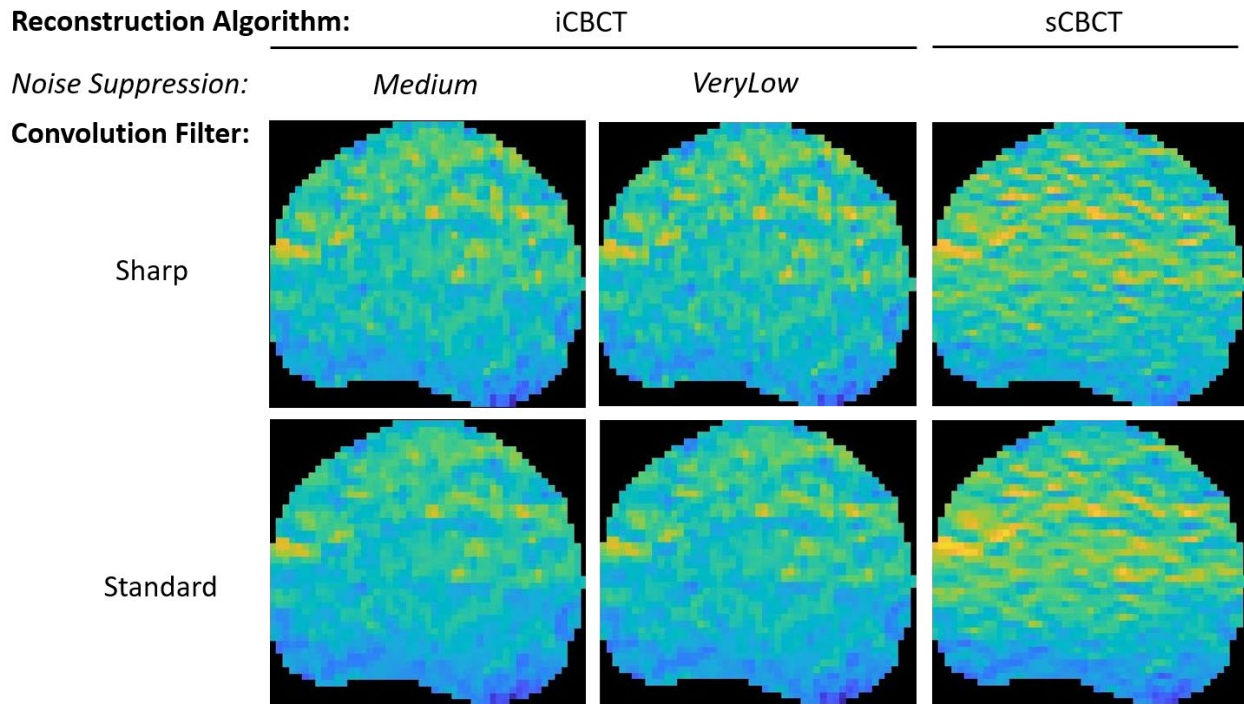

Supplementary Figure 1: Reconstructed CBCT images of a prostate cancer patient using various reconstruction methods considered in this work. This example shows the same image slice of the prostate for one patient that has been reconstructed with different reconstruction methods.

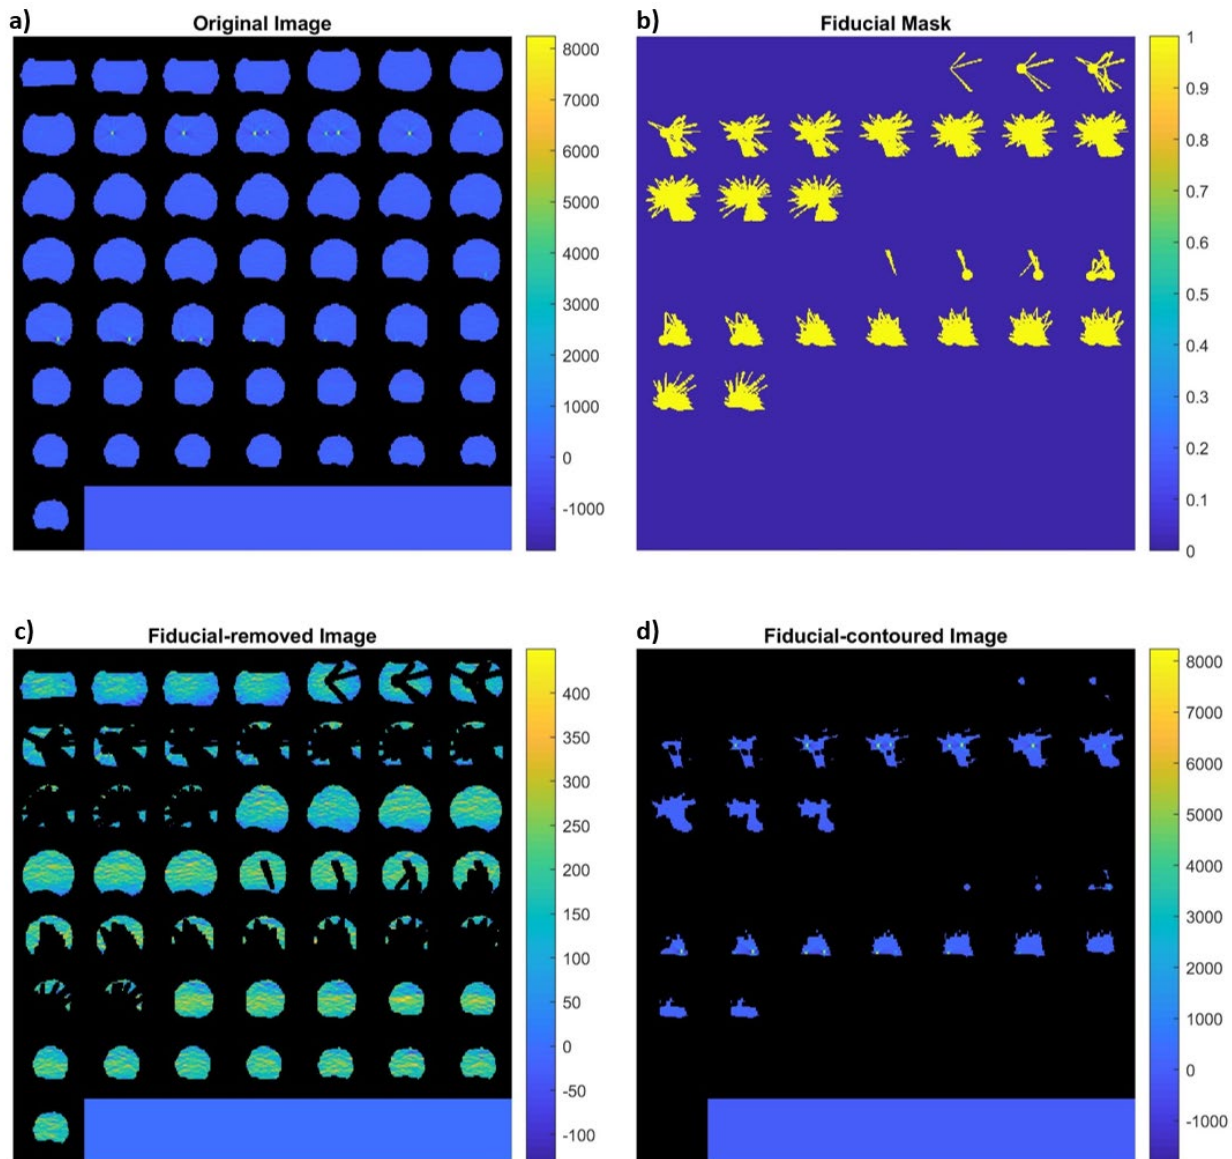

Supplemental Figure 2: Example of gold artifact removal algorithm of a prostate CBCT image showing the different stages of the process that include a) the original image, b) the fiducial mask, c) fiducial-removed image, and d) the fiducial portion of the image that was removed.
